# Supplementary material for: Transcription factor EB reprograms branched‐chain amino acid metabolism and promotes pancreatic cancer progression via transcriptional regulation of BCAT1
Source: PubMed Central journal article supplement (PMC11533072; doi:10.1111/cpr.13694), 2024-06-27

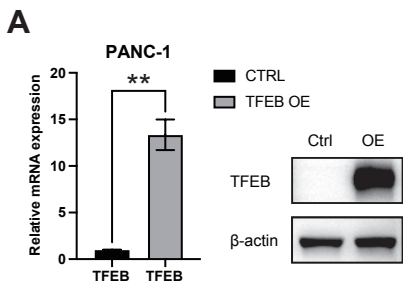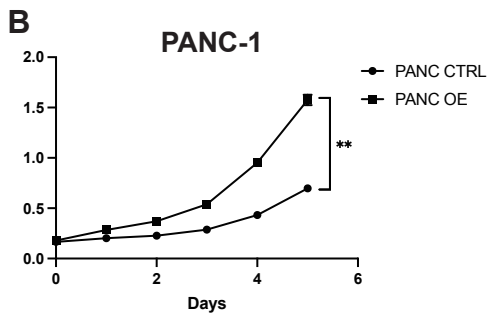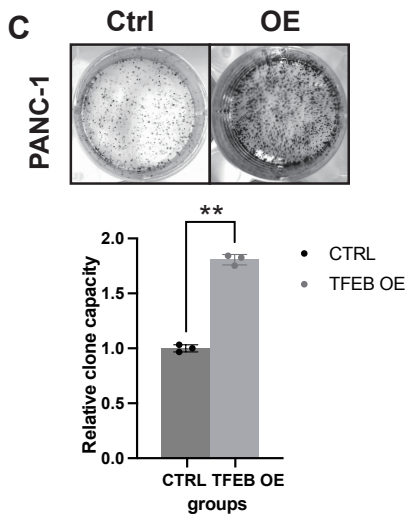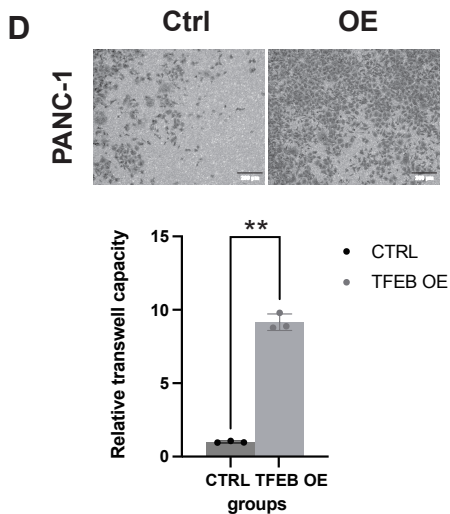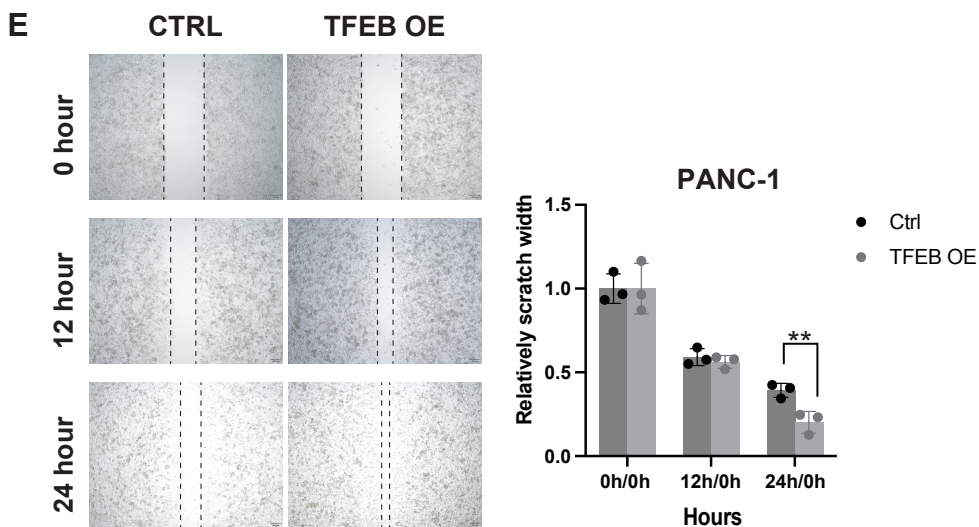

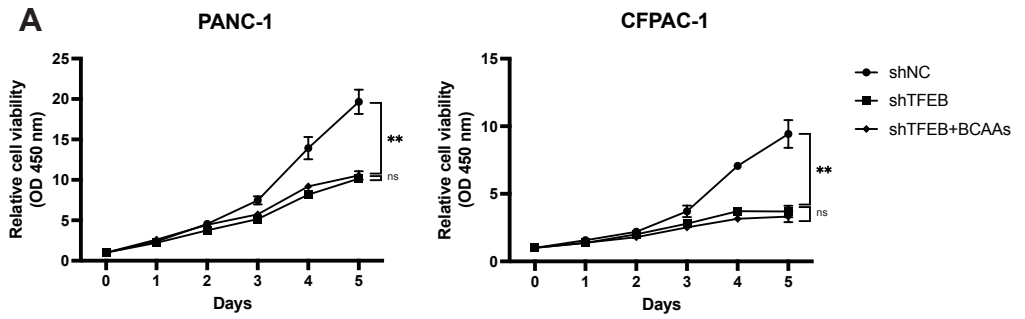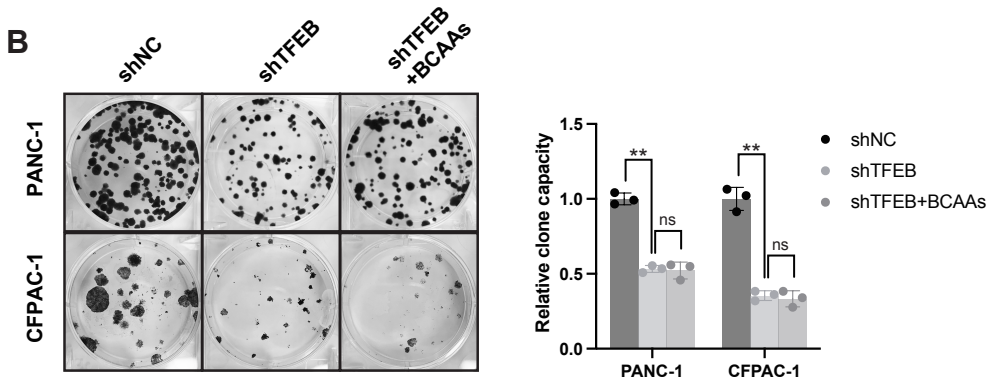

**A**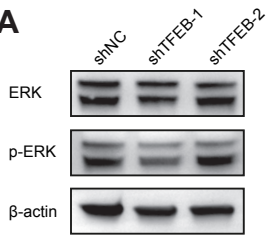**B**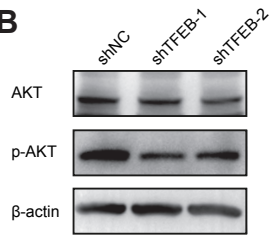

Supplement: CPR-57-e13694-s002.pdf [file CPR-57-e13694-s002.pdf]
